# Supplementary material for: Selection of Reliable Reference Genes for Gene Expression Studies of a Promising Oilseed Crop, Plukenetia volubilis, by Real-Time Quantitative PCR
Source: PubMed Central journal article supplement (PMC4490458; doi:10.3390/ijms160612513), 2015-06-03
Supplement: ijms-16-12513-s001.pdf [file ijms-16-12513-s001.pdf]

## Supplementary Information

>Pvo18S RNA (5'-3')

TAGTTTGTGGTACCTACTACTCGGATAACCGTAGTAATTCTAGAGCTAATACGTGCAACAAACCCCGACTTCTGGAAGGGAT  
GCATTTATTAGATAAAAGGTCGACGCGGGCTCTGCCGTCGCTCTGACGATTCATGATAACTCGACGGATCGACGGCCTTCGTGCC  
GGCGACGCATCATTCAAATTTCTGCCCTATCAACTTTGATGGTAGGATAGAGGCCTACCATGGTGGTGACGGGTGACGGAGAATTA  
GGGTTGATTCGGAGAGGGAGCCTGAGAAACGGCTACCACATCCAAGGAAGGCAGCAGGCGCGCAAATTACCCAATCCTGACA  
CGGGGAGGTAGTGACAATAAATAACAATACCGGGCTCATCGAGTCTGGTAATTGGAATGAGTACAATCTAAATCCCTTAACGAGGAT  
CCATTGGAGGGCAAGTCTGGTGCCAGCAGCCGCGTAATTCCAGCTCCAATAGCGTATATTTAAGTTGTTGCAGTTAAAAAGCTCG  
TAGTTGGACCTTGGGATGGTTCGTCGGTCCGCTAGCGGTGTGCACCTGTGACTCGTCCCTTTTGGCGCGATGCGCTCCTGGC  
CTTAACTGGCCGGTCTGCTCCGCGCTGTTACTTTGAAGAAATTAGAGTGCTCAAAGCAAGCCTACGCTCTGTATACATTAGC  
ATGGGATAACATCATAGGATTTCCGGTCTATTCTGTTGGCCTTCGGGATCGGAGTAATGATTAACAGGGACAGTCGGGGGCATTCTG  
ATTTCATAGTCAGAGGTGAAATTTCTGGATTTATGAAAGACGAACTGCGAAAGCATTGCGCAAGGATGTTTTTATTAATCAAGA  
ACGAAAGTTGGGGCTCGAAGACGATCAGATACCGTCTAGTCTCAACCATAAACGATGCCGACCAGGGATCGGCGGATGTTGCTT  
TTAGGACTCCGCGGCACCTTATGAGAAATCAAAGTCTTTGGGTTCCGGGGGAGTATGGTCGCAAGGCTGAAACTTAAAGGAATT  
GACGGAAGGGCACCACCAGGAGTGGAGCCTGCGGCTTAATTTGACTCAACACGGGGAACTTACCAGGTCCAGACATAGTAAGG  
ATTGACAGACTGAGAGCTCTTTCTTGATTCTATGGGTGGTGGTGCATGGCCGTTCTTAGTTGGTGGAGCGATTTGTCTGGTTAATTC  
CGTTAACGAAACGAGACCTCAGCCTGCTAAGCTATGCGGAGGATCCCTCCGCGGCCAGCTTCTTAGAGGGACTATGGCCTTCT  
AGGCCAAGGAAGTTTGGAGCAATAACAGTCTGTGATGCCCTTAGATGTTCTGGGCCGACGCGCGCTACACTGATGTATTCAACG  
AGTCTATAGCCTTGGCCGACAGGCCCGGTAATCTTTGAAATTTATCGTGTGATGGGGATAGATCATTGCAATTGTTGGTCTTCAACG  
AGGAATTCCTAGTAAGCGCGAGTCATCAGCTCGCGTTGACTACGTCCCTGCCCTTTGTACACACCCGCCGTCGCTCCTACCGATTGA  
ATGGTCCGGTGAAGTGTTCCGGATCGCGCGCAGTGGGCGGTTTCGCTGCCGCGACGTGCGGAGAAGTCCACTGAACCTTATCATT  
AGAGGAAGGAGAAGTTCGTAACAAGGTTTCCGTAGGTGAACCTGCGGAAGGATCATTGTCTGA

>PvoACT (5'-3')

ATGGCTGATGGTGAAGATATTCAGCCCCTCGTTTGTGACAATGGAAGTGGTGAAGGCTGGGTTCCCGGTGATGATGCTCC  
AAGGGCAGTGTTCCTAGCATTGTTGGAAGACCTAGACATACTGGCGTCATGGTTGGGATGGGTCAGAAAGATGCTTATGTAGGTG  
ATGAAGCACAGTCTAAAAGAGGTATCCTGACCTTGAATACCCATTGAGCATGGTATAGTTAGCAATTGGGATGATATGGAAGA  
TCTGGCATCATACTTTTACAATGAGTCCGTGTTGCACCTGAGGAGCATCCAGTGCTTCTCACTGAGGCCCTCTTAAACCCTAAGG  
CCAACAGAGAGAAGATGACTCAGATCATGTTGAGACCTTAAATGTCCCTGCAATGTACGTCGCCATTCAGGCTGTTCTCTCTTGT  
ATGCCAGTGGCCGTACAACCTGGTATCGTGCTTATTCTGGTATGGTGTGAGTCACACTGTGCCAATTTATGAAGGTTACGCTCTCC  
CACATGCCATCCTCCGTCTGGACCTTGTGGACGTGATCTCACTGATGCTTTAATGAAGATTCTCACTGAGAGAGGGTACATGTTCA  
CCACCCTGCTGAACGGAAATTGTCGTCGATGAAGGAGAACTTGATATGTTGCCCTTACTATGAGCAGGAGCTTGGAGACT  
GCCAAGAGCAGCTCCTCTGTTGAAAAGAACTACGAGCTTCTGATGGCCAGGTCATCACCATTGGAGCCGAGAGATTCCGTTGCC  
CAGAAGTCTTGTTCAGCCATCTTCATTGGAATGGAAGCCGAGGCATTCATGAACTACTTACAACCTTATCATGAAGTGTGATG  
TCGATATTAGGAAGGACCTTTATGGTAATATTGTGCTTAGTGGTGGTTCCTACTATGTTCCCTGGTATTGCAGACCGTATGAGCAAGGA  
GATCACCGCGCTTGTCTCCAGCAGTATGAAGATTAAGGTGGTGGCTCCACCAGAGAGAAAATACAGTGTCTGGATTGGAGGATCTA  
TCCTTGCATCCCTCAGTACCTTCCAGCAGATGTGGATTTCCAAGGGCGAGTATGACGAGTCTGGTCCATCCATTGTCCACAGGAAGT  
GCTTC

Figure S1. *Cont.*

PvoCYC (5'-3')

GGTCGCATAGTCATGGGTCTCTTTGGCAACACAGTTCCTAAGACTGCAGAAAATTTTCGAGCACTTTGTACGGGAGAGAAAAGGAAT  
 TGGAAAAAATGGGAAGCCTCTTCATTACAAAGGAAGCTCTTTCCACAGGATTATCCCAGCTTTATGATTCAAGGTGGTGAATTTAC  
 CCGAGGTGATGGACGAGGTGGAGAGTCAATCTATGGTGAGAAGTTCGCCGATGAAAATTTCAAGCTGAAGCACACTGGACCAGGA  
 ATTCTGTCAATGGCAAATGCTGGCAAGATACGAACGGATCACAGTTCTTTGTAACACTGTAATGACCAGCTGGTTGGATGGCCAT  
 CACGTGGTGTTCGGCAAGGTGCTTTCTGGGATGGATGTTGCTACAAGATTGAAGCTGAAGGAAGTCGGAGTGGAGTGCCTAGAA  
 GAAAAGTTGTCATTTTAGACAGTGGTGAATTGCCTTTA

>PvoEF1 $\alpha$  (5'-3')

GCGACCACCCCAAGTACTCTAAGGCCAGGTATGATGAAATTGTCAAGGAAGTTTCTTCATACCTTAAGAAGGTTGGATACAACCC  
 TGAAAAGATCCCATTGTTCTATTTCTGGTTTTCGAAGGTGACAACATGATTGAGAGATCCACCAATCTGGATTGGTACAAGGGTCC  
 AACCTTGCTCGAGGCTTTAGACCTGATCAATGAGCCAAAGAGGCCACAGATAAGCCTCTTCGTCTGCCACTCCAGGACGTTTACA  
 AGATTGGTGGTATTGGAAGTGTCCAGTGGGTGCGTGTGGAAACAAGTATTCTCAAGCCTGGTATGGTTGTGACCTTTGGACCAAGT  
 GGGCTAACAACTGAAGTTAAGTCTGTTGAGATGCATCATGAGGCTCTCAGGAGGCTCTCCCTGGTGACAACGTTGGCTTCAACGT  
 TAAGAATGTTGCTGTCAAGGATCTGAAGAGAGGATACGTTGCATCCAACCTCAAAGGATGATCCTACCAAGGAGGCTGCAAACCTTCA  
 CATCCCAGGTTATCATCATGAACCACCCTGGTCAGATTGGTAACGGATATGCCCCAGTACTGGACTGCCACACCTCCCACATTGCTG  
 TGAAGTTTGCCGAGATCCTGACCAAGATTGACCGTCGATCTGAAAAAGAGCTTGAAGAAGGAACCCAAATCTTGAAGAATGGTGA  
 TGCTGGTTTTCGTGAAGATGATTCCAACAAAGCCATGGTGGTTGAAACCTTCTCCGAGTATCCTCCACTGGGTCGTTTTGCTGTCAG  
 GGACATGCGTCAGACTGTTGCCGTCGGTGTCAAGAGTGTGAGAAGAAGGATCCATCTGGAGCCAAGGTCACCAAGTCCGCT  
 GTCAAGAAGGGAGGAAAA

>PvoGAPDH (5'-3')

ATGGCTTCGGCTACTTTCTTTGTAGCCAAACCATCCCTTCAGGGAAATGGAAAAGGATTCCAGGAATTTTCAGGACTCCGTAACCTC  
 ATCAGCTTTCCCTTCTTTTTCCAGGAAATCTTCTGATGACTTCTCTGTCGTTGCTTTCCAGACTTCTGCTGTTGGAAGCAGCAAT  
 GTAGGATACAGGAAAATTGCAGCTATGGCAAAGCTAAAAGTTGCCATTAATGGATTTGGAAGGATTGGAAGGAACTTCTTGAGGTG  
 CTGGCATGGACGCAAAGATTCCCCACTTGATGTCATTGCCATCAACGACAGTGGCGGTGTCAAGCAAGCTTCTCACCTCCTGAAAT  
 ACGATTCTACGCTTGGCATCTTTGAAGCTGATGTCAAGCCTGTTGGTACTGATGCAATCTCTGTCGATGGCAAGGTCATCAAGGTTG  
 TTTCTGACAGAAACCCTGTCAACCTTCCATGGAAGGACTTGGGGATCGACCTGGTGTGATCGAAGGAACCGGAGTTTTCGTTGACAG  
 GGAAGGTGCTGGCAAGCATATTCAGGCAGGAGCTAAGAAGGTTCTCATCACAGCGCCTGGAAAGGGTGACATCCAACCTATGTT  
 GTGGGAGTCAATGCTGATACCTACAATCCTGATGAGCCAAATCATCAGCAATGCTTCTTGCACTACTAACTGCCTTGCTCCCTTTGTC  
 AAGGTCCTTGACCAGAAAATTTGGGATCATCAAGGTTACCATGACAACAACCTCACTCGTACACCGGCGACCAAAGGCTGCTCGACG  
 CGAGCCATCGTGACTTAAGAAGAGCAAGAGCCGCGCTCTAAATATTGTTCCAACATCAACAGGCGCAGCCAAGGCAGTAGCCCT  
 CGTCCCTTCATCTCTGAAAGGCAAACCTAAATGGCATCGCATTGCGAGTTCCAACCTCAAACGATCAGTCGTCGATCTCGTAATCCA  
 GGTGGAGAAGAAGACCTTTGCAGAAGAAGTAAACGCGGCGTTTAAAGAGAGTGCAGAGAATGAACTAAAGGGTATACTGTCAGT  
 CTGCGACGAGCCACTTGTTCGGTTGATTTCAAGGTGCACAGATGTTTCTTCGACAGTTGATTCTTCGTTGACAATGGTGTGAGGAG  
 ATGACATGGTTAAGGTCATTGCTTGGTATGATAATGAATGGGTTATTCTCAAAGGGTTGTGGATTGGCTGACATTGTTGCCAGTAA  
 CTGGAAA

Figure S1. *Cont.*

>PvoPLA (5'-3')

TTAGGTCACACCTTTGATATGCATTCGGATAAGGATTTGGGAGTGAGCCTTAAATTCAATGATGCTATTTTATTGAATACCATAGAAA  
 AGCAAGAGCAAACGTCTCATTGATTACAAGGTGTTGGGATGGTCTTTCCTTCCATTTGACCTTCGGGTATCAATACTAAAGTTA  
 ATGTTTGAACACCGATTGCGATAAACAAGGGTTTGAACATTCAGAGACTGATTAGGAACAATTTCAAACCCACAAATGCTGTT  
 TTGTCCAGGACTTCTACTGCCATAGAAAAACCAAAGCAGAAGATCCATTTGATATCAAGTTCTTGGGATGGTCCCTCCTATCCTTG  
 TTACCTTGGACTATCAATGCTAATGATAGTATTGAAACACCGCCGGCTACCATAAACAGAGGGTTGAAAAGGCGTGCCCCGATCTCGT  
 GGTGCCGTTGAAAATGGTGAATCTTTGCGCTTTAGACCATATGTCTCCAAGGTTCCCTTGGCATACTGGTCCAAGAGGCTTTCTTTCT  
 CTGCTATTTCCACGTTACGGGCATTATTGTGGGCCCAACTGGTCAAGTGGAAAAGATGGTGGGTCCTCTGTTGGGATAAGAGGCC  
 AATAGATTGGTTGGATTATTGCTGCTACTGCCATGACATGGGTTATGACACTGATGACCAAGCCAGGCTGCTGAAGGCCGATCTACA  
 GTTTCTGGAGTGCTTGGAGAGACCACGTGTTACTTCTAAAGGAGACACGGGTATTGCTTGTGTTTATAAAAATGTGCATCACAG  
 GTATGCGGAGCAATAACAATCTTTTTTCTATTATATGATAATTAGCCTATGAAATAAGTTTTTCTTCTCAGATGGGATGAATGCAGG  
 TCTGTGTGCTTTCTCATGGTGCTTAAATATAGGTTAGTCGTTGTGTTACTTTTTGTCTTAAATGATTGTAGGGCTTAGGAACTTCT  
 GATACCATACAGAACGCAGCTTGTGAACTTGGAGCTTAGGCCACCAATCCTTAATTTGGATGGCTGAGCAATGTTAAATGGATAGG  
 TTGGAACCTGGCGGAAACA

>PvoRPII (5'-3')

ATGGAAGGAGCTTCCAAATACCAGCGTCTTCCAAGAATCAAATCCGAGAACTGAAAGATGATTACTGCAAATTCGAACTGCGCG  
 ATACCGACGCTTCTATGGCAAACGCGTTGCGGCGCGTGATGATTTCCGAAGTTCCCACCATAGCTATCGACTTGGTCGAAATCGAAG  
 TTAACCTTCGGTCTTAAACGACGAGTTTATTGCTCACC<sup>GCCTCGGTCTCATTCTTACAAG</sup>CGAACGTGCTATGAGCATGCGCT  
 TCTCACGTGATTGTGATGCTTGTGATGGTGACGG<sup>TCAGTCCGAGTATTGTTCTGTTGAGTT</sup>TCATCTCCGTGCTAGATGTACTACTGA  
 TCAAACCCTAGATGTTACTAGTAAGGATTTGATTCTTCTGATCATACTGTTGTTCTGTTGATTTCTCCGATTCTGCTGCTTTTACT  
 CCTCTGAGCAAAGGGGAATTACTATCGTCAAGCTGCGGAGAGGGCAAGAATTAAGATTGAGAGCAATTGCTAGGAAAGGAATTGG  
 GAAAGATCATGCGAAATGGTCGCCTGCGGCAACAGTGACATTGATGATGAACCTGATATTCATATTAATGAGGATTTGATGGAAC  
 TTTGTGCTTGGAGAGAAACAAGTTGGGTTGAAAGTAGTCTACGAAAGTGTGACATTGATCCTAATACTCAACAGGTTGTAG  
 TTGTTGACCCTGAAGCATACTTACGATGATGAAGTGCTCAAGAAAGCCGAAGCTTTGGGAAATCGGGGCTCGTGGATATCCGT  
 GCAAAGGAAGACAGTTTTATATCACGGTTGAATCAACTGGTGCAATTAAGCTTCTCAGCTGGTACTCAATGCCATAGAAGTTCTA  
 AAACAAAATGGATGCTGTTTCGCTTGTCTGAAGACACCGTGGAAGCTGATGATCAGTTTGGTGAGCTAGGTGCTCACATGCGCGG  
 AGGA

>PvoRPS13 (5'-3')

AAAAATTTGTCGTTTCGTTGGCAGAGGGTACAATGTCTGCGTATCGG<sup>TAATGCACAGCTTCCAGATGAC</sup>AAGAGATTGCGGTTTTTCT  
 CTTACGCACATCCGTGGAATTGGGCGCCAAAGAGCTCATCAAATCCTTGTGACTTAAAGCCTAGAGAACAAGCACACCAAGA  
 TGACTGGATTGGAACCTCACTCTCTTAGAGATGAAGTCTCCAAGTACTTGATTGG<sup>AGAAGAATCAAAGCGACTGGT</sup>GGAAGTGAT  
 ATACAGAAATTGACAGACATTCAGTGCTACCGAGGATATAATCATGCTTCTGTTTGCCTTGTAGAGGACAGCGTACTAAAACCAAT  
 GCTCAAACGAGGAAGGGACAAAGA

Figure S1. *Cont.*

>PvoTEF2 (5'-3')

TTGATGGATTTCGAAAGCGAGAGAAAAGCGTCTGCTAGAGTTGTTTCGAGTGGCATGGAATGGTGCCATAGGAGCTGCGCTTCATAG  
 AAAACAAGACGAAGATCGATGCCTCCATGCCTTATCTCGCTTAAAGTTCTTTCTGTTTCCAAAGATATTCTTGGTTTCGACCAATGT  
 CGCCATCAGCATCTATAATCTCCAGACCCATTCCAGCAACAGAATTCAATGTCTGTCTCGTGAAGTTATCACCCGCATGGAAGAAGAA  
 GGTTCATGATCTCGTTTTGCGAACATCCTTCACGCCCATGAAACCTGGAGATGATTCAAGTAAAGCTGGAAACAGAGTTACCGTTC  
 CTTTGAATCGCGTCAAGATTCAGAGCATGAAGAGGGGACAAGTTACAGGAGCAAATTCTCGAGGGTTTTCGCGATGGTGTGAAAGA  
 AGATTCATCTGCTTATGCATATGATGCAGCAAGAGTTCGCATCTCCCTGGAGTCGGAGTTGTTCTTGCAATGGGGTGCTCCTGCCGA  
 TGGAAATCGCAACAAATACCGATCC TTGTTGTTCAACATGAATGCATTGGAGATGGCTAGTGATGCGATGAAGCAGGATGTCAAAT  
 GTATTCAAGCCAAAGCTCTGGAGAAGTGT

>PvoTUB (5'-3')

ATGCTCACATTCTCTGTGTTTCCATCGCCGAAAGTTTTCGGACACGGTGGTTGAGCCTTATAATGCTACTCTTTCTGTTCATCAGTTGG  
 TTGAGAATGCCGATGAATGCATGGTTCTTGATAATGAGGCTCTCTACGATATCTGCTTCAGGACTCTTAAGCTCACCCTCCTAGCTT  
 TGGTGATTTGAACCACTTGATCTCTGCAACTATGAGTGGAGTAACATGCTGCCTGAGGTTCCCTGGTCAACTCAACTCTGACCTCC  
 GAAAGCTTGCTGTGAACCTTATCCATTCCCTCGTCTTCACTTCTTCATGGTTGGTTTCGCTCCTTTGACATCTCGTGGTTCTCAGCA  
 ATACCGGGCATTAAACAGTGCCAGAACTTACTCAGCAAATGTGGGATGCCAAGAACATGATGTGTGCTGCTGATCCTCGGCACGGGC  
 GCTACCTCACTGCATCTGCTATGTTCCGTGGAAAGATGAGCACCAAGGAAGTGGATGAGCAGATGATCAATGTTTCAGAACAAGAA  
 CTCGTCTACTTTGTGGAGTGGATTCCGAACAATGTGAAATCCAGTGTCTGTGACATTCCGCCTCGAGGGCTTTCCATGGCATCCAC  
 CTTTCGTTGGGAACTCAACTTCCATCCAGGAAATGTTTAGGAGGGTAAGCGAACAATTCACTGCCATGTTTCAGGAGAAAAGCTTTCT  
 TGCATTGGTACACGGGTGAAGGAATGGATGAGATGGAGTTCACCGAAGCTGAGAGCAATATGAATGATCTCGTGTCCGAGTACCAG  
 CAGTACCAGGATGCAACTGCTGATGACGAAGGTGACTACGAAGATGACGAGGAAGATGAATCGGTGCAT

>PvoUBL (5'-3')

CCACCACGAAGGCGGAGGACAAGGTGCAGAGTGGATTCCTTTTGAATATGTAGTCTGCCAATGTGCGTCCATCTTCCAATTGCT  
 TCCCAGCGAAGATCAGCCTTTGCTGGTCTGGGGGAATACCCTCCTTGTCTGGATCTTAGCCTTACGTTATCAATTGTATCTGAA  
 CTCTCAACCTCCAGCGTGATGGTTTTCCAGTCAGAGTTTTGACGAATATCTGCATTCTCCACGCAGACGTAGCACCAGATGCA  
 GAGTAGACTCCTTCTGAATGTTGTAGTCAGCAAGAGTCCATCTTCAAGCTGCTTACCAGCGAAAATCAACCTCTGCTGGTCC  
 GGTGGGATCCCTTCTTATCTTGGATTTTGGCCTTGACATTATCAATGG

>PvoUCE (5'-3')

ATGACGCTTGGCGGCTCAGGTGGATCTAGTGTCTGTTTCTCGAAACTTCAGATTGCTGGAGGAACTTGAACGTGGTGAAAAAG  
 GTATTGGAGATGGTACAGTAAGCTATGGAATGGATGACGGAGACGACATCTACATGCGTTCGTGGACTGGAACAATAATTGGTCTCT  
 ACAATACTGTGCATGAAAGTAGAATTTATCAGTTGAAGCTATTTTGTGATAAGGATTATCCAGAGAAGCCACCAAGTGTTCGATTC  
 ATTCACGGATTAATATGACTTGTGTTAACCATGAAACTGGAGTGGTGGAAACCAAGAAGTTTGGACTTCTTGCAAACTGGCAGCGG  
 GATTACACGATGGAGGATATTCTGACACAGCTGAAGAAGGAGATGGCCACCCACACAACCGGAAGCTAGTTCAACCTCCTGAGG  
 GTACCTACTTC

Figure S1. Cont.

>PvoAG (5'–3')

CATGATACGCCAGCTTTTAGGTGACCTATAGAATACTCAAGCTATGCATCCAACGCGTTGGGAGCTCTCCCATATGGTCGACCTGCA  
 GGCGGCCGGAATTCAGTAGTGATTTCGAGCTCCTTCCTTCATTTTCTGCATCTCTTTCTCTAGTACTCAATCAGATTTATAGAAACC  
 CAAGAAAAAAAAAACAACCTTCTTTCTCTCCTCAATTAGCATCTTCATTTTGTATTCTCTATCAAAGATCAGCTGCCATGGCATAT  
 CAAGGCGATTTCGGGGGAGAACTCACCTCAGAGGAAATTGGGTAGGGGAAAGATCGAGATCAAGCGGATCGAGAACACCACAAAT  
 CGCCAAGTTACTTTCTGCAAAAAGAAGGAATGTTTTGCTGAAGAAAGCTTATGAACTGTCTGTTCTTTGTGATGCTGAAGTTGCTCT  
 TATTGTCTTCTCTAGCCGCGGCCGCCTCTATGAGTACGCTAACCAATAGCGTTAAATCAACGATTGAGAGGTATAAAAAGGCTAGCTC  
 GGATTCATCCAACACTGGCTCCATCGCTGAAGCTAATGCCAGTTCATCAGCAAGAAGCGGCCAAACTACGTGTGCAAATTGGCA  
 ATTTGCAGAACTCAAACAGGCATATGATGGGGGAGTCGTTGGGAGGCTTGAACGTCAAAGACCTTAAGAGCCTGGAGATAAAATT  
 AGAAAAAGGAATTAGCAGGATTCGATCAAAGAAGAACGAGTTGTTGTTTCGCAGAGATTGAGTATATGCAGAAAAGAGAAATTGAT  
 CTGCACAACAATAACCAGTTTCTTCGAGCCAAGATTGCTGAAAATGAAAGGAAGCAGAAGAACATGAATTTGATGCCAGTAGGTG  
 ATAACTATGAGATAATGCAACCTCATCCATATGATAACCGCAACTATTTTCAAGTGAATGCATTACAACCCACGAATCATTACCCGCC  
 TCAAGACCAAATGTCGCTTCAGTTAGTTAAA**GTCTGTCGTCTTTCTCTCGA**TTTTCTGTGGGAAGAGAAGTTAATCAGGTATTTT  
 ACCAACTGAAAAGCTGCAAAAAAATCCTGAAAAACTTCTAGCAGAGAAAT**CAAAACCTGAGCAAATCCTTC**CATTTCATAATTACTA  
 ATGTGAAATCCAA

**Figure S1.** The cDNA sequences of the twelve candidate reference genes and *PvoAG* gene. Yellow highlighted sequences are forward primers sequences; green highlighted sequences are reverse primers sequences.

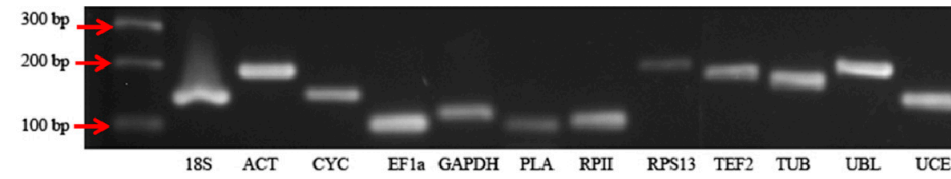

**Figure S2.** The PCR products electrophoresis result of the twelve candidate reference genes.

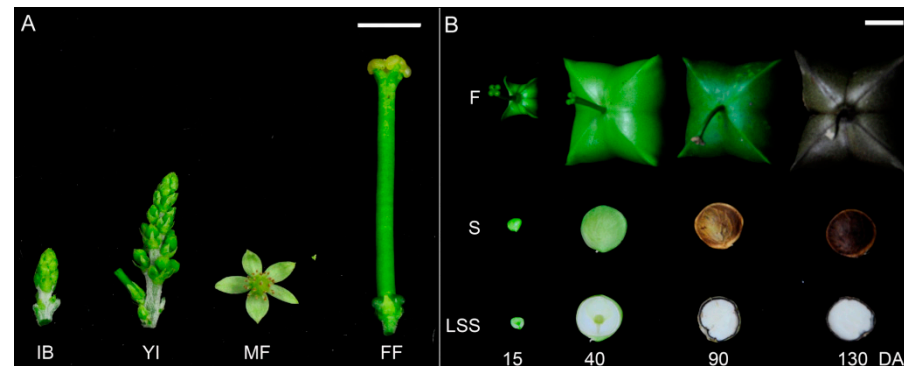

**Figure S3.** The appearance of Sacha inchi during various developmental stages of the reproductive organs. **(A)** Developmental stages of flower. IB, inflorescence bud; YI, young inflorescence; MF, male flower; FF, female flower. Bar = 0.5 cm; and **(B)** Developmental stages of fruit and seed. Fruit and seed from 15 to 130 DAP. F, fruit; S, seed; LSS, longitudinal section of seed; DAP, days after pollination. Bar = 1 cm. The PCR products electrophoresis result of the twelve candidate reference genes.

**Table S1.** Cycle threshold ( $C_t$ ) values for twelve candidate reference genes.

| Tissue<br>Samples | Genes and $C_t$ Values |              |              |                               |              |              |              |              |              |              |              |              |
|-------------------|------------------------|--------------|--------------|-------------------------------|--------------|--------------|--------------|--------------|--------------|--------------|--------------|--------------|
|                   | <i>18S</i>             | <i>ACT</i>   | <i>CYC</i>   | <i>EF1<math>\alpha</math></i> | <i>GAPDH</i> | <i>PLA</i>   | <i>RPII</i>  | <i>RPS13</i> | <i>TEF2</i>  | <i>TUB</i>   | <i>UBL</i>   | <i>UCE</i>   |
| SR                | 8.03 ± 0.13            | 17.59 ± 0.20 | 21.98 ± 0.11 | 19.48 ± 0.06                  | 30.19 ± 0.22 | 23.35 ± 0.09 | 22.94 ± 0.04 | 25.89 ± 0.17 | 23.54 ± 0.08 | 24.28 ± 0.15 | 16.91 ± 0.12 | 21.90 ± 0.07 |
| SS                | 8.06 ± 0.08            | 16.35 ± 0.19 | 21.43 ± 0.08 | 17.94 ± 0.04                  | 19.61 ± 0.11 | 23.35 ± 0.19 | 22.22 ± 0.35 | 24.06 ± 0.22 | 23.98 ± 0.42 | 20.93 ± 0.04 | 16.97 ± 0.21 | 20.53 ± 0.04 |
| SYL               | 8.03 ± 0.13            | 16.14 ± 0.03 | 20.56 ± 0.14 | 16.27 ± 0.11                  | 18.01 ± 0.11 | 22.73 ± 0.17 | 19.73 ± 0.19 | 24.69 ± 0.13 | 23.70 ± 0.10 | 19.68 ± 0.08 | 17.34 ± 0.06 | 20.33 ± 0.08 |
| SML               | 8.87 ± 0.03            | 17.01 ± 0.18 | 22.92 ± 0.14 | 19.17 ± 0.05                  | 17.19 ± 0.05 | 23.70 ± 0.12 | 22.84 ± 0.05 | 26.25 ± 0.26 | 24.76 ± 0.21 | 22.40 ± 0.06 | 19.04 ± 0.14 | 21.30 ± 0.13 |
| AR                | 10.91 ± 0.09           | 18.73 ± 0.22 | 23.63 ± 0.07 | 20.47 ± 0.11                  | 27.56 ± 0.15 | 23.85 ± 0.07 | 24.31 ± 0.01 | 27.46 ± 0.15 | 25.05 ± 0.37 | 24.38 ± 0.15 | 19.62 ± 0.20 | 22.36 ± 0.04 |
| AS                | 8.29 ± 0.15            | 15.44 ± 0.05 | 20.71 ± 0.14 | 16.83 ± 0.11                  | 18.34 ± 0.52 | 23.58 ± 0.09 | 21.00 ± 0.13 | 24.39 ± 0.12 | 22.97 ± 0.32 | 19.39 ± 0.21 | 16.87 ± 0.23 | 20.87 ± 0.06 |
| AYL               | 23.58 ± 0.18           | 19.46 ± 0.22 | 22.69 ± 0.04 | 20.94 ± 0.25                  | 20.81 ± 0.10 | 24.26 ± 0.03 | 24.43 ± 0.15 | 26.80 ± 0.37 | 25.33 ± 0.11 | 21.34 ± 0.15 | 18.72 ± 0.06 | 22.61 ± 0.11 |
| AML               | 9.36 ± 0.04            | 16.64 ± 0.07 | 22.47 ± 0.02 | 19.26 ± 0.04                  | 17.29 ± 0.18 | 22.96 ± 0.03 | 22.80 ± 0.05 | 26.70 ± 0.02 | 23.53 ± 0.18 | 22.64 ± 0.22 | 17.63 ± 0.10 | 22.03 ± 0.15 |
| IB                | 9.31 ± 0.07            | 16.97 ± 0.13 | 22.17 ± 0.08 | 17.28 ± 0.06                  | 19.23 ± 0.28 | 22.71 ± 0.23 | 21.05 ± 0.21 | 24.53 ± 0.21 | 22.37 ± 0.11 | 19.96 ± 0.41 | 17.45 ± 0.13 | 21.33 ± 0.12 |
| YI                | 9.88 ± 0.06            | 16.33 ± 0.05 | 20.82 ± 0.13 | 16.77 ± 0.36                  | 18.58 ± 0.07 | 22.25 ± 0.16 | 19.94 ± 0.37 | 24.32 ± 0.09 | 21.47 ± 0.27 | 19.46 ± 0.23 | 16.42 ± 0.17 | 20.63 ± 0.02 |
| FF                | 8.65 ± 0.07            | 16.60 ± 0.25 | 21.56 ± 0.04 | 18.16 ± 0.03                  | 19.14 ± 0.15 | 22.61 ± 0.18 | 21.03 ± 0.26 | 24.82 ± 0.16 | 22.72 ± 0.46 | 20.80 ± 0.10 | 17.12 ± 0.05 | 20.99 ± 0.13 |
| MF                | 8.63 ± 0.18            | 16.68 ± 0.04 | 20.97 ± 0.04 | 18.94 ± 0.08                  | 18.88 ± 0.29 | 22.95 ± 0.06 | 23.15 ± 0.22 | 27.66 ± 0.07 | 23.05 ± 0.24 | 25.86 ± 0.09 | 15.88 ± 0.06 | 21.60 ± 0.09 |
| 15 DAP            | 8.53 ± 0.04            | 16.29 ± 0.01 | 21.35 ± 0.10 | 17.08 ± 0.19                  | 22.30 ± 0.17 | 22.82 ± 0.09 | 20.18 ± 0.30 | 23.53 ± 0.12 | 22.45 ± 0.06 | 19.21 ± 0.19 | 17.35 ± 0.15 | 20.17 ± 0.01 |
| 40 DAP            | 8.81 ± 0.12            | 15.53 ± 0.12 | 20.43 ± 0.22 | 17.65 ± 0.09                  | 23.30 ± 0.20 | 23.81 ± 0.10 | 21.71 ± 0.06 | 24.57 ± 0.11 | 23.75 ± 0.09 | 19.44 ± 0.14 | 17.02 ± 0.07 | 19.85 ± 0.09 |
| 90 DAP            | 16.23 ± 0.08           | 18.30 ± 0.22 | 23.47 ± 0.11 | 20.88 ± 0.17                  | 30.47 ± 0.01 | 25.82 ± 0.06 | 23.55 ± 0.27 | 27.46 ± 0.09 | 23.03 ± 0.19 | 26.33 ± 0.30 | 17.64 ± 0.04 | 23.04 ± 0.21 |
| 130 DAP           | 20.37 ± 0.12           | 19.30 ± 0.22 | 23.56 ± 0.18 | 21.97 ± 0.23                  | 28.58 ± 0.10 | 23.75 ± 0.07 | 24.24 ± 0.41 | 27.13 ± 0.29 | 23.83 ± 0.27 | 28.96 ± 0.19 | 18.53 ± 0.02 | 24.12 ± 0.14 |
| Average $C_t$     | 8.84 ± 4.76            | 16.66 ± 1.25 | 21.77 ± 1.11 | 18.55 ± 1.72                  | 19.42 ± 4.72 | 23.35 ± 0.85 | 22.51 ± 1.58 | 25.36 ± 1.41 | 23.53 ± 1.02 | 21.13 ± 2.98 | 17.35 ± 0.99 | 21.31 ± 1.15 |

SR, seedling root; SS, seedling stem; SYL, seedling young leaf; SML, seedling mature leaf; AR, adult root; AS, adult stem; AYL, adult young leaf; AML, adult mature leaf; IB, inflorescence bud; YI, young inflorescence; MF, male flower; FF, female flower; 15 DAP, seed of 15 days after pollination; 40 DAP, seed of 40 days after pollination; 90 DAP, seed of 90 days after pollination; 130 DAP, seed of 130 days after pollination. Values are mean ± SD; standard deviation of three independent technical.

**Table S2.** Stability ranking of candidate reference genes in different tissues and developmental stages.

| Experiment Sets | Ranking Order * | RefFinder                     |                           | $\Delta C_t$                  | BestKeeper                    |                               | NormFinder                     |                               | geNorm          |                               |                 |
|-----------------|-----------------|-------------------------------|---------------------------|-------------------------------|-------------------------------|-------------------------------|--------------------------------|-------------------------------|-----------------|-------------------------------|-----------------|
|                 |                 | Genes                         | Geomean of Ranking Values | Genes                         | Average of Standard Deviation | Genes                         | Standard Deviation [ $\pm$ CP] | Genes                         | Stability Value | Genes                         | Stability Value |
| Seedlings       | 1               | <i>UCE</i>                    | 1.495                     | <i>UCE</i>                    | 1.223                         | <i>PLA</i>                    | 0.277                          | <i>UCE</i>                    | 0.033           | <i>ACT</i>   <i>UCE</i>       | 0.067           |
|                 | 2               | <i>ACT</i>                    | 2.000                     | <i>ACT</i>                    | 1.227                         | <i>18S</i>                    | 0.311                          | <i>ACT</i>                    | 0.034           | -                             | -               |
|                 | 3               | <i>PLA</i>                    | 3.027                     | <i>CYC</i>                    | 1.272                         | <i>TEF2</i>                   | 0.385                          | <i>EF1<math>\alpha</math></i> | 0.267           | <i>PLA</i>                    | 0.393           |
|                 | 4               | <i>18S</i>                    | 4.356                     | <i>PLA</i>                    | 1.291                         | <i>ACT</i>                    | 0.527                          | <i>RPS13</i>                  | 0.571           | <i>18S</i>                    | 0.488           |
|                 | 5               | <i>CYC</i>                    | 4.821                     | <i>18S</i>                    | 1.360                         | <i>UCE</i>                    | 0.584                          | <i>CYC</i>                    | 0.592           | <i>TEF2</i>                   | 0.527           |
|                 | 6               | <i>TEF2</i>                   | 5.886                     | <i>RPS13</i>                  | 1.363                         | <i>CYC</i>                    | 0.726                          | <i>RPII</i>                   | 0.688           | <i>CYC</i>                    | 0.58            |
|                 | 7               | <i>RPS13</i>                  | 6.055                     | <i>EF1<math>\alpha</math></i> | 1.410                         | <i>UBL</i>                    | 0.736                          | <i>PLA</i>                    | 0.704           | <i>RPS13</i>                  | 0.630           |
|                 | 8               | <i>EF1<math>\alpha</math></i> | 6.593                     | <i>TEF2</i>                   | 1.436                         | <i>RPS13</i>                  | 0.847                          | <i>TUB</i>                    | 0.857           | <i>UBL</i>                    | 0.686           |
|                 | 9               | <i>RPII</i>                   | 8.349                     | <i>RPII</i>                   | 1.526                         | <i>RPII</i>                   | 1.101                          | <i>18S</i>                    | 0.971           | <i>EF1<math>\alpha</math></i> | 0.781           |
|                 | 10              | <i>UBL</i>                    | 8.859                     | <i>UBL</i>                    | 1.631                         | <i>EF1<math>\alpha</math></i> | 1.109                          | <i>TEF2</i>                   | 1.131           | <i>RPII</i>                   | 0.851           |
|                 | 11              | <i>TUB</i>                    | 10.156                    | <i>TUB</i>                    | 1.820                         | <i>TUB</i>                    | 1.519                          | <i>UBL</i>                    | 1.402           | <i>TUB</i>                    | 0.975           |
|                 | 12              | <i>GAPDH</i>                  | 12.000                    | <i>GAPDH</i>                  | 5.811                         | <i>GAPDH</i>                  | 4.472                          | <i>GAPDH</i>                  | 5.786           | <i>GAPDH</i>                  | 1.781           |
| Adult plants    | 1               | <i>RPS13</i>                  | 2.213                     | <i>RPS13</i>                  | 1.626                         | <i>UCE</i>                    | 0.785                          | <i>EF1<math>\alpha</math></i> | 0.260           | <i>CYC</i>   <i>RPS13</i>     | 0.273           |
|                 | 2               | <i>CYC</i>                    | 2.515                     | <i>CYC</i>                    | 1.632                         | <i>PLA</i>                    | 0.854                          | <i>ACT</i>                    | 0.377           | -                             | -               |
|                 | 3               | <i>EF1<math>\alpha</math></i> | 3.000                     | <i>EF1<math>\alpha</math></i> | 1.691                         | <i>UBL</i>                    | 0.899                          | <i>RPII</i>                   | 0.408           | <i>EF1<math>\alpha</math></i> | 0.599           |
|                 | 4               | <i>UCE</i>                    | 3.500                     | <i>RPII</i>                   | 1.700                         | <i>CYC</i>                    | 1.024                          | <i>RPS13</i>                  | 0.537           | <i>RPII</i>                   | 0.647           |
|                 | 5               | <i>RPII</i>                   | 4.427                     | <i>UCE</i>                    | 1.712                         | <i>TEF2</i>                   | 1.084                          | <i>CYC</i>                    | 0.606           | <i>UCE</i>                    | 0.699           |
|                 | 6               | <i>ACT</i>                    | 4.736                     | <i>ACT</i>                    | 1.756                         | <i>RPS13</i>                  | 1.223                          | <i>UCE</i>                    | 0.796           | <i>ACT</i>                    | 0.763           |
|                 | 7               | <i>PLA</i>                    | 5.803                     | <i>UBL</i>                    | 1.844                         | <i>ACT</i>                    | 1.346                          | <i>PLA</i>                    | 1.023           | <i>UBL</i>                    | 0.810           |
|                 | 8               | <i>UBL</i>                    | 5.856                     | <i>TEF2</i>                   | 1.975                         | <i>RPII</i>                   | 1.470                          | <i>UBL</i>                    | 1.131           | <i>TEF2</i>                   | 0.861           |
|                 | 9               | <i>TEF2</i>                   | 7.326                     | <i>PLA</i>                    | 1.977                         | <i>EF1<math>\alpha</math></i> | 1.595                          | <i>TEF2</i>                   | 1.292           | <i>PLA</i>                    | 0.944           |
|                 | 10              | <i>TUB</i>                    | 10.000                    | <i>TUB</i>                    | 2.488                         | <i>TUB</i>                    | 2.194                          | <i>TUB</i>                    | 1.675           | <i>TUB</i>                    | 1.158           |
|                 | 11              | <i>GAPDH</i>                  | 11.000                    | <i>GAPDH</i>                  | 4.806                         | <i>GAPDH</i>                  | 4.562                          | <i>GAPDH</i>                  | 4.531           | <i>GAPDH</i>                  | 1.786           |
|                 | 12              | <i>18S</i>                    | 12.000                    | <i>18S</i>                    | 5.350                         | <i>18S</i>                    | 4.575                          | <i>18S</i>                    | 5.129           | <i>18S</i>                    | 2.380           |



Table S2. Cont.

| Experiment Sets    | Ranking Order * | RefFinder                     |                           | $\Delta Ct$                   |                               | BestKeeper                    |                                 | NormFinder                    |                 | geNorm                        |                 |
|--------------------|-----------------|-------------------------------|---------------------------|-------------------------------|-------------------------------|-------------------------------|---------------------------------|-------------------------------|-----------------|-------------------------------|-----------------|
|                    |                 | Genes                         | Geomean of Ranking Values | Genes                         | Average of Standard Deviation | Genes                         | Standard Deviation [ $\pm CP$ ] | Genes                         | Stability Value | Genes                         | Stability Value |
| Flower development | 1               | <i>PLA</i>                    | 1.861                     | <i>PLA</i>                    | 0.836                         | <i>ACT</i>                    | 0.182                           | <i>UCE</i>                    | 0.076           | <i>ACT</i>   <i>GAPDH</i>     | 0.157           |
|                    | 2               | <i>ACT</i>                    | 1.968                     | <i>UCE</i>                    | 0.842                         | <i>PLA</i>                    | 0.199                           | <i>PLA</i>                    | 0.133           | -                             | -               |
|                    | 3               | <i>UCE</i>                    | 2.378                     | <i>ACT</i>                    | 0.880                         | <i>GAPDH</i>                  | 0.231                           | <i>TEF2</i>                   | 0.199           | <i>PLA</i>                    | 0.220           |
|                    | 4               | <i>GAPDH</i>                  | 2.913                     | <i>GAPDH</i>                  | 0.900                         | <i>UCE</i>                    | 0.330                           | <i>EF1<math>\alpha</math></i> | 0.397           | <i>UCE</i>                    | 0.247           |
|                    | 5               | <i>TEF2</i>                   | 4.401                     | <i>TEF2</i>                   | 0.902                         | <i>18S</i>                    | 0.479                           | <i>ACT</i>                    | 0.467           | <i>TEF2</i>                   | 0.343           |
|                    | 6               | <i>EF1<math>\alpha</math></i> | 6.447                     | <i>EF1<math>\alpha</math></i> | 1.041                         | <i>TEF2</i>                   | 0.480                           | <i>GAPDH</i>                  | 0.536           | <i>CYC</i>                    | 0.418           |
|                    | 7               | <i>CYC</i>                    | 6.964                     | <i>CYC</i>                    | 1.085                         | <i>CYC</i>                    | 0.487                           | <i>RPII</i>                   | 0.762           | <i>UBL</i>                    | 0.498           |
|                    | 8               | <i>UBL</i>                    | 8.426                     | <i>RPII</i>                   | 1.221                         | <i>UBL</i>                    | 0.567                           | <i>CYC</i>                    | 0.875           | <i>EF1<math>\alpha</math></i> | 0.599           |
|                    | 9               | <i>RPII</i>                   | 8.651                     | <i>UBL</i>                    | 1.263                         | <i>EF1<math>\alpha</math></i> | 0.762                           | <i>RPS13</i>                  | 1.101           | <i>18S</i>                    | 0.686           |
|                    | 10              | <i>18S</i>                    | 8.779                     | <i>18S</i>                    | 1.379                         | <i>RPII</i>                   | 0.930                           | <i>UBL</i>                    | 1.148           | <i>RPII</i>                   | 0.798           |
|                    | 11              | <i>RPS13</i>                  | 10.462                    | <i>RPS13</i>                  | 1.431                         | <i>RPS13</i>                  | 1.163                           | <i>18S</i>                    | 1.204           | <i>RPS13</i>                  | 0.914           |
|                    | 12              | <i>TUB</i>                    | 12.000                    | <i>TUB</i>                    | 2.639                         | <i>TUB</i>                    | 2.170                           | <i>TUB</i>                    | 2.615           | <i>TUB</i>                    | 1.202           |
| Seed development   | 1               | <i>UCE</i>                    | 2.376                     | <i>UCE</i>                    | 1.586                         | <i>UBL</i>                    | 0.449                           | <i>UCE</i>                    | 0.217           | <i>RPII</i>   <i>RPS13</i>    | 0.490           |
|                    | 2               | <i>RPS13</i>                  | 2.546                     | <i>RPS13</i>                  | 1.625                         | <i>TEF2</i>                   | 0.525                           | <i>EF1<math>\alpha</math></i> | 0.229           | -                             | -               |
|                    | 3               | <i>RPII</i>                   | 3.310                     | <i>EF1<math>\alpha</math></i> | 1.632                         | <i>PLA</i>                    | 0.883                           | <i>RPS13</i>                  | 0.350           | <i>EF1<math>\alpha</math></i> | 0.677           |
|                    | 4               | <i>EF1<math>\alpha</math></i> | 3.568                     | <i>ACT</i>                    | 1.641                         | <i>CYC</i>                    | 1.313                           | <i>RPII</i>                   | 0.525           | <i>UCE</i>                    | 0.695           |
|                    | 5               | <i>UBL</i>                    | 4.304                     | <i>RPII</i>                   | 1.660                         | <i>ACT</i>                    | 1.444                           | <i>ACT</i>                    | 0.587           | <i>ACT</i>                    | 0.734           |
|                    | 6               | <i>ACT</i>                    | 4.729                     | <i>CYC</i>                    | 1.702                         | <i>RPII</i>                   | 1.476                           | <i>CYC</i>                    | 0.844           | <i>CYC</i>                    | 0.768           |
|                    | 7               | <i>CYC</i>                    | 5.422                     | <i>UBL</i>                    | 2.169                         | <i>RPS13</i>                  | 1.620                           | <i>UBL</i>                    | 1.832           | <i>UBL</i>                    | 0.958           |
|                    | 8               | <i>PLA</i>                    | 6.260                     | <i>PLA</i>                    | 2.273                         | <i>UCE</i>                    | 1.786                           | <i>PLA</i>                    | 1.892           | <i>PLA</i>                    | 1.106           |
|                    | 9               | <i>TEF2</i>                   | 6.344                     | <i>TEF2</i>                   | 2.450                         | <i>EF1<math>\alpha</math></i> | 2.029                           | <i>GAPDH</i>                  | 2.065           | <i>TEF2</i>                   | 1.217           |
|                    | 10              | <i>GAPDH</i>                  | 9.740                     | <i>GAPDH</i>                  | 2.686                         | <i>GAPDH</i>                  | 3.360                           | <i>TEF2</i>                   | 2.215           | <i>GAPDH</i>                  | 1.518           |
|                    | 11              | <i>TUB</i>                    | 11.000                    | <i>TUB</i>                    | 3.182                         | <i>TUB</i>                    | 4.156                           | <i>TUB</i>                    | 2.874           | <i>TUB</i>                    | 1.860           |
|                    | 12              | <i>18S</i>                    | 12.000                    | <i>18S</i>                    | 4.003                         | <i>18S</i>                    | 4.813                           | <i>18S</i>                    | 3.901           | <i>18S</i>                    | 2.217           |

Table S2. Cont.

| Experiment Sets     | Ranking Order * | RefFinder                     |                           | $\Delta$ Ct                   | BestKeeper                    |                               | NormFinder                     |                               | geNorm          |                               |                 |
|---------------------|-----------------|-------------------------------|---------------------------|-------------------------------|-------------------------------|-------------------------------|--------------------------------|-------------------------------|-----------------|-------------------------------|-----------------|
|                     |                 | Genes                         | Geomean of Ranking Values | Genes                         | Average of Standard Deviation | Genes                         | Standard Deviation [ $\pm$ CP] | Genes                         | Stability Value | Genes                         | Stability Value |
| Entire growth cycle | 1               | <i>UCE</i>                    | 1.861                     | <i>UCE</i>                    | 1.570                         | <i>PLA</i>                    | 0.616                          | <i>EF1<math>\alpha</math></i> | 0.287           | <i>ACT</i>   <i>UCE</i>       | 0.585           |
|                     | 2               | <i>ACT</i>                    | 2.213                     | <i>ACT</i>                    | 1.576                         | <i>UBL</i>                    | 0.747                          | <i>ACT</i>                    | 0.340           | -                             | -               |
|                     | 3               | <i>EF1<math>\alpha</math></i> | 3.224                     | <i>EF1<math>\alpha</math></i> | 1.593                         | <i>TEF2</i>                   | 0.779                          | <i>UCE</i>                    | 0.447           | <i>CYC</i>                    | 0.622           |
|                     | 4               | <i>CYC</i>                    | 4.162                     | <i>CYC</i>                    | 1.615                         | <i>UCE</i>                    | 0.915                          | <i>RPII</i>                   | 0.542           | <i>EF1<math>\alpha</math></i> | 0.743           |
|                     | 5               | <i>PLA</i>                    | 4.450                     | <i>RPII</i>                   | 1.636                         | <i>CYC</i>                    | 0.942                          | <i>CYC</i>                    | 0.742           | <i>RPII</i>                   | 0.791           |
|                     | 6               | <i>RPII</i>                   | 5.318                     | <i>RPS13</i>                  | 1.708                         | <i>ACT</i>                    | 0.994                          | <i>RPS13</i>                  | 0.842           | <i>RPS13</i>                  | 0.830           |
|                     | 7               | <i>UBL</i>                    | 5.471                     | <i>PLA</i>                    | 1.817                         | <i>RPS13</i>                  | 1.277                          | <i>PLA</i>                    | 1.085           | <i>UBL</i>                    | 0.913           |
|                     | 8               | <i>RPS13</i>                  | 6.236                     | <i>UBL</i>                    | 1.837                         | <i>RPII</i>                   | 1.342                          | <i>UBL</i>                    | 1.238           | <i>PLA</i>                    | 0.961           |
|                     | 9               | <i>TEF2</i>                   | 6.839                     | <i>TEF2</i>                   | 1.905                         | <i>EF1<math>\alpha</math></i> | 1.445                          | <i>TEF2</i>                   | 1.347           | <i>TEF2</i>                   | 0.997           |
|                     | 10              | <i>TUB</i>                    | 10.000                    | <i>TUB</i>                    | 2.615                         | <i>TUB</i>                    | 2.439                          | <i>TUB</i>                    | 1.979           | <i>TUB</i>                    | 1.261           |
|                     | 11              | <i>18S</i>                    | 11.000                    | <i>18S</i>                    | 4.220                         | <i>18S</i>                    | 3.406                          | <i>18S</i>                    | 3.946           | <i>18S</i>                    | 1.781           |
|                     | 12              | <i>GAPDH</i>                  | 12.000                    | <i>GAPDH</i>                  | 4.285                         | <i>GAPDH</i>                  | 3.920                          | <i>GAPDH</i>                  | 4.022           | <i>GAPDH</i>                  | 2.198           |

\* The 1st is the most stable, and the 12th is the least stable.
